# Supplementary material for: Factors Associated With Liver Transplant Referral Among Patients With Cirrhosis at Multiple Safety-Net Hospitals
Source: PubMed Central journal article supplement (PMC10251211; doi:10.1001/jamanetworkopen.2023.17549), 2023-06-08
Supplement: jamanetwopen-e2317549-s001.pdf [file jamanetwopen-e2317549-s001.pdf]

## Supplementary Online Content

Yilma M, Kim NJ, Shui AM, et al. Factors associated with liver transplant referral among patients with cirrhosis at multiple safety-net hospitals. *JAMA Netw Open*. 2023;6(6):e2317549. doi:10.1001/jamanetworkopen.2023.17549

**eTable 1.** Sample Characteristics of Participants Missing Data vs Those Not Missing Data  
**eTable 2.** Breakdown of Referral, Evaluation, Waitlist, and Transplant Rates by Safety Net Hospital  
**eTable 3.** Univariate Logistic Regression Models for Referral Outcome  
**eFigure.** Referral Outcomes in Patients With No Psychosocial Contraindications for LT Evaluation

This supplementary material has been provided by the authors to give readers additional information about their work.

**eTable 1.** Sample Characteristics of Participants Missing Data vs Those Not Missing Data

| Variable                               | Cases Not Missing Data<br>N = 220 | Cases with Missing Data<br>N = 301 | p-value |
|----------------------------------------|-----------------------------------|------------------------------------|---------|
| Site 1                                 | 147 (66.8)                        | 151 (50.2)                         | <.001   |
| Site 2                                 | 2 (0.9)                           | 140 (46.5)                         |         |
| Site 3                                 | 71 (32.3)                         | 10 (3.3)                           |         |
| <b>Sex</b>                             |                                   |                                    | 0.87    |
| Male                                   | 155 (70.5)                        | 210 (69.8)                         |         |
| Female                                 | 65 (29.6)                         | 91 (30.2)                          |         |
| <b>Race and Ethnicity</b>              |                                   |                                    | <.001   |
| Non-Hispanic White patients            | 26 (11.8)                         | 82 (27.2)                          |         |
| Non-Hispanic Black patients            | 16 (7.3)                          | 17 (5.7)                           |         |
| Hispanic/Latinx patients               | 165 (75.0)                        | 146 (48.5)                         |         |
| Non-Hispanic Other <sup>a</sup>        | 13 (5.9)                          | 31 (10.3)                          |         |
| Unknown/missing                        | 0 (0.0)                           | 25 (0.3)                           |         |
| <b>Marital Status</b>                  |                                   |                                    | 0.003   |
| Single                                 | 112 (50.9)                        | 133 (44.2)                         |         |
| Married                                | 67 (30.5)                         | 90 (29.9)                          |         |
| Divorced/Separated/Widowed             | 41 (18.6)                         | 61 (20.3)                          |         |
| Unknown/Missing                        | 0 (0.0)                           | 17 (5.7)                           |         |
| <b>Foreign Born</b>                    | 141 (64.1)                        | 146 (48.5)                         | <.001   |
| <b>Documentation Status</b>            |                                   |                                    | <.001   |
| Not Undocumented                       | 136 (61.8)                        | 74 (24.6)                          |         |
| Undocumented                           | 84 (38.2)                         | 42 (14.0)                          |         |
| Unknown/missing                        | 0 (0.0)                           | 185 (61.5)                         |         |
| <b>Housing</b>                         |                                   |                                    | <.001   |
| Unstable Housing <sup>b</sup>          | 36 (12.7)                         | 30 (10.0)                          |         |
| Stable Housing                         | 184 (83.6)                        | 160 (53.2)                         |         |
| Unknown/missing                        | 0 (0.0)                           | 111 (36.9)                         |         |
| <b>Insurance type</b>                  |                                   |                                    | <.001   |
| Medicaid                               | 179 (81.4)                        | 159 (52.8)                         |         |
| Medicare                               | 23 (10.5)                         | 59 (19.6)                          |         |
| Uninsured                              | 18 (8.2)                          | 56 (18.6)                          |         |
| Private                                | 0 (0.0)                           | 9 (3.0)                            |         |
| Unknown/missing                        | 0 (0.0)                           | 18 (6.0)                           |         |
| <b>Diabetes</b>                        | 53 (24.1))                        | 76 (25.3)                          | 0.76    |
| <b>Variceal bleed</b>                  | 42 (19.1)                         | 38 (12.6)                          | 0.04    |
| <b>Alcohol use</b>                     |                                   |                                    | 0.001   |
| Current                                | 50 (22.7)                         | 77 (25.6)                          |         |
| Prior                                  | 141 (64.1)                        | 159 (52.8)                         |         |
| Never                                  | 29 (13.2)                         | 48 (16.0)                          |         |
| Unknown/missing                        | 0 (0.0)                           | 17 (5.7)                           |         |
| <b>Etiology</b>                        |                                   |                                    | 0.13    |
| NASH/NAFLD                             | 18 (8.2)                          | 25 (8.3)                           |         |
| Alcohol-associated liver disease (ALD) | 129 (58.6)                        | 151 (50.2)                         |         |
| Hepatitis B Virus (HBV)                | 3 (1.4)                           | 14 (4.7)                           |         |
| Hepatitis C Virus (HCV)                | 53 (24.1)                         | 88 (29.2)                          |         |
| Other <sup>c</sup>                     | 17 (7.7)                          | 23 (7.6)                           |         |

Missing Data Cases represent participants missing values for any variables included in the multivariable models

<sup>a</sup>other race and ethnicity includes Asian American/Pacific Islander patients (n=29), American Indian/Alaskan Native patients (n=12), Multiracial (n=4)

<sup>b</sup>Unstable Housing = Single Room Occupation, homeless

<sup>c</sup>other etiology: Primary Biliary cholangitis (PBC), Primary sclerosing cholangitis (PSC), Cryptogenic and Autoimmune hepatitis

p-values are from Pearson chi-squared and Wilcoxon rank sum tests for categorical and continuous variables, respectively

**eTable 2.** Breakdown of Referral, Evaluation, Waitlist, and Transplant Rates by Safety Net Hospital

| <b>Variable</b> | <b>Total (%)</b> | <b>Referred (%)</b> | <b>Waitlisted (%)</b> | <b>Transplanted (%)</b> |
|-----------------|------------------|---------------------|-----------------------|-------------------------|
| Site 1          | 298              | 99 (33.2)           | 38 (38.4)             | 24 (63.2)               |
| Site 2          | 142              | 22 (15.5)           | 5 (22.7)              | 2 (40.0)                |
| Site 3          | 81               | 24 (29.6)           | 8 (33.3)              | 2 (25.0)                |
| Total           | 521              | 145 (27.8)          | 51 (35.2)             | 28 (54.9)               |

**eTable 3.** Univariate Logistic Regression Models for Referral Outcome

| Variable                                                    | OR (95% CI)       | p-value |
|-------------------------------------------------------------|-------------------|---------|
| <b>Age (years)</b>                                          | 1.01 (0.99, 1.03) | 0.328   |
| <b>Male sex</b>                                             | 0.49 (0.32, 0.73) | <.001   |
| <b>Race/Ethnicity (ref = Hispanic/Latinx)</b>               |                   | <.001   |
| White                                                       | 0.49 (0.28, 0.84) | 0.009   |
| Black                                                       | 0.14 (0.03, 0.59) | 0.007   |
| Other <sup>a</sup>                                          | 0.80 (0.40, 1.63) | 0.54    |
| Unknown/missing                                             | 1.98 (0.87, 4.49) | 0.10    |
| <b>Marital Status (ref = single)</b>                        |                   | 0.006   |
| Married                                                     | 1.87 (1.21, 2.88) | 0.005   |
| Divorced/Widowed/Separated                                  | 0.78 (0.45, 1.37) | 0.39    |
| Unknown/Missing                                             | 0.65 (0.18, 2.33) | 0.50    |
| <b>Foreign Born</b>                                         | 1.82 (1.22, 2.71) | 0.003   |
| <b>Documentation Status (ref = not undocumented)</b>        |                   | <.001   |
| Undocumented                                                | 0.52 (0.32, 0.85) | 0.009   |
| Unknown/missing                                             | 0.40 (0.25, 0.63) | <.001   |
| <b>Primary language (ref = English)</b>                     |                   |         |
| Spanish                                                     | 1.33 (0.90, 1.98) | 0.16    |
| Other <sup>b</sup>                                          | 1.52 (0.67, 3.40) | 0.31    |
| <b>Housing Status (ref = stable housing)</b>                |                   | 0.05    |
| Unstable Housing <sup>c</sup>                               | 0.42 (0.21, 0.85) | 0.02    |
| Unknown/missing                                             | 0.95 (0.59, 1.52) | 0.82    |
| <b>Insurance type (ref = Medicaid)</b>                      |                   | <.001   |
| Private                                                     | 1.08 (0.26, 4.40) | 0.92    |
| Medicare                                                    | 0.84 (0.49, 1.43) | 0.53    |
| Uninsured                                                   | 0.30 (0.14, 0.62) | 0.001   |
| Unknown/missing                                             | 0.43 (0.12, 1.52) | 0.19    |
| <b>Diabetes</b>                                             | 1.90 (1.24, 2.88) | 0.003   |
| <b>Hypertension</b>                                         | 1.10 (0.70, 1.71) | 0.68    |
| <b>Hepatic Decompensation (Ascites, HE, Variceal bleed)</b> | 1.24 (0.74, 2.05) | 0.41    |
| <b>Ascites</b>                                              | 1.13 (0.73, 1.75) | 0.58    |
| <b>Hepatic Encephalopathy</b>                               | 1.23 (0.83, 1.83) | 0.30    |
| <b>Variceal Bleed</b>                                       | 1.81 (1.10, 3.00) | 0.02    |
| <b>Alcohol use (ref = never/prior)</b>                      |                   | <.001   |
| Current                                                     | 0.33 (0.19, 0.57) | <.001   |
| Unknown/missing                                             | 0.27 (0.06, 1.19) | 0.08    |
| <b>Disease Etiology (ref = HCV)</b>                         |                   | 0.003   |
| NASH/NAFLD                                                  | 3.42 (1.70, 7.00) | 0.001   |
| HBV                                                         | 2.29 (0.81, 6.49) | 0.12    |
| Alcoholic liver disease (ALD)                               | 1.07 (0.66, 1.72) | 0.78    |
| Other <sup>d</sup>                                          | 1.76 (0.83, 3.76) | 0.14    |
| <b>MELD at baseline (ref = 15 – 20)</b>                     |                   |         |
| 21 – 25                                                     | 0.99 (0.62, 1.58) | 0.98    |
| > 25                                                        | 0.91 (0.50, 1.65) | 0.75    |
| <b>Site (ref = Site 1)</b>                                  |                   | <.001   |
| Site 2                                                      | 0.37 (0.22, 0.62) | <.001   |
| Site 3                                                      | 0.85 (0.50, 1.44) | 0.54    |

<sup>a</sup>other race and ethnicity includes Asian American/Pacific Islander patients (n=29), American Indian/Alaskan Native patients (n=12), Multiracial (n=4)

<sup>b</sup>Other language includes Tigrinya, Punjabi, Arabic, Samoan, Chinese, Korean, Khmer, Thai, Tagalog, Russian, and Vietnamese

<sup>c</sup>Unstable Housing = Single Room Occupation, homeless

<sup>d</sup>other etiology: Primary Biliary cholangitis (PBC), Primary sclerosing cholangitis (PSC), Cryptogenic and Autoimmune hepatitis

**eFigure.** Referral Outcomes in Patients With No Psychosocial Contraindications for LT Evaluation

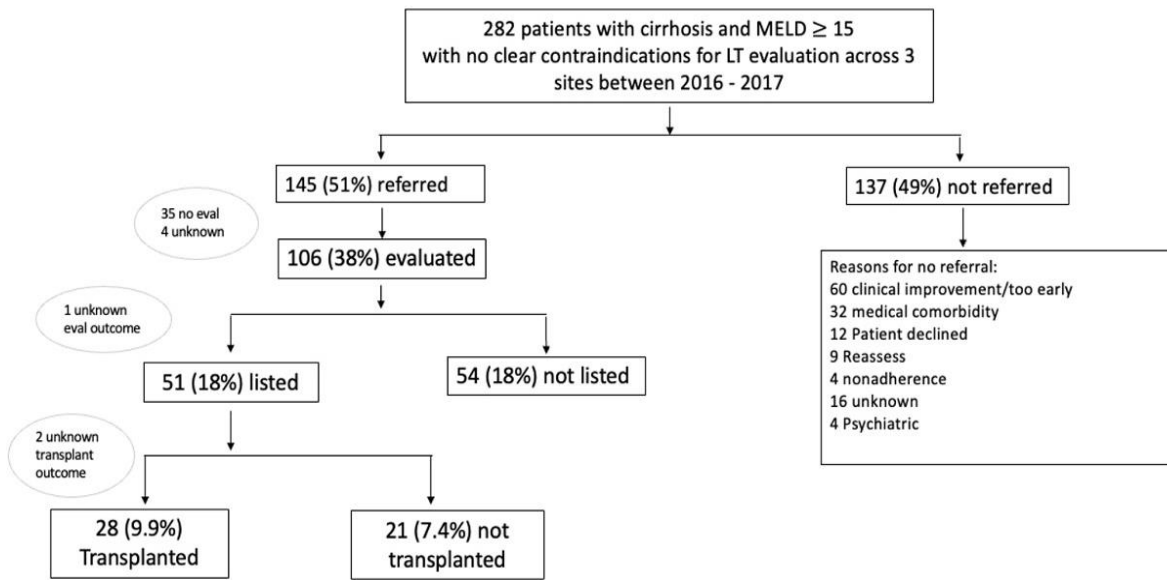

Note: Percentile calculation based on cohort of individuals with no clear contraindication for LT evaluation (n = 282)
