# Supplementary material for: Factors Associated With Liver Transplant Referral Among Patients With Cirrhosis at Multiple Safety-Net Hospitals
Source: PubMed Central journal article supplement (PMC10251211; doi:10.1001/jamanetworkopen.2023.17549), 2023-06-08
Supplement: jamanetwopen-e2317549-s002.pdf [file jamanetwopen-e2317549-s002.pdf]

## Data Sharing Statement

Yilma. Factors Associated With Liver Transplant Referral Among Patients With Cirrhosis at Multiple Safety-Net Hospitals. *JAMA Netw Open*. Published June 08, 2023.  
doi:10.1001/jamanetworkopen.2023.17549

### Data

**Data available:** No
